# Supplementary material for: How Does the Job Interview Medium Affect Fairness Perceptions and Interview Ratings? The Mediating Role of Perceptions of Social Presence Does the Job Interview Medium Affect Fairness Perceptions and Interview Ratings? The Mediating Role of Perceptions of Social Presence
Source: Research Square preprint supplement (doi:10.21203/rs.3.rs-7538230/v1), 2025-10-06
Supplement: Supplementary file 1 [file 7e4eb7deee3aa6d22c2cc921.docx]

#### Appendix 1 English Versions of Scales Used in the Study

##### Applicant’s Perception of Social Presence

Instructions: Please recall the just-concluded interview process. To what extent do the following descriptions match? (1 = “strongly disagree” to 5 = “strongly agree”)

|  | Strongly disagree | Disagree | Neither agree nor disagree | Agree | Strongly agree |
| --- | --- | --- | --- | --- | --- |
| During the interview, I felt as if I shared the same space and time with the interviewer. |  |  |  |  |  |
| During the interview, I felt as if I were physically present in the interview room. |  |  |  |  |  |
| During the interview, I could continuously exchange views with the interviewer. |  |  |  |  |  |
| During the interview, I could answer the interviewer's questions smoothly. |  |  |  |  |  |
| During the interview, my questions received timely responses from the interviewer. |  |  |  |  |  |
| During the interview, the interviewer conveyed a sense of enthusiasm. |  |  |  |  |  |
| During the interview, the interviewer heightened my emotional awareness. |  |  |  |  |  |
| During the interview, the interviewer’s moods, such as happiness or anger, affected my emotions to some extent. |  |  |  |  |  |

##### Interviewer’s Nonverbal Social Presence Perception

Instructions: Please recall the just-concluded interview process. To what extent do the following descriptions match? (1 = “strongly disagree” to 5 = “strongly agree”)

|  | Strongly disagree | Disagree | Neither agree nor disagree | Agree | Strongly agree |
| --- | --- | --- | --- | --- | --- |
| The applicant used appropriate hand gestures to support his or her verbal message. |  |  |  |  |  |
| The applicant responded to my questions with head nodding. |  |  |  |  |  |
| The applicant smiled a lot during the interview. |  |  |  |  |  |
| The applicant displayed friendly non-verbal cues like smiling and nodding. |  |  |  |  |  |
| The applicant always maintained eye contact with me. |  |  |  |  |  |
| The applicant sat upright during the interview. |  |  |  |  |  |

##### Nonverbal Communication Expectations

Instructions: Imagine that you have applied for a job, passed the first screening, and been invited to a job interview. To what extent do the following descriptions match your thoughts? (1 = “strongly disagree” to 5 = “strongly agree”)

|  | Strongly disagree | Disagree | Neither agree nor disagree | Agree | Strongly agree |
| --- | --- | --- | --- | --- | --- |
| During this interview, I expect that I will be able to make eye contact with the interviewer. |  |  |  |  |  |
| During this interview, I expect that I will be able to smile to the interviewer. |  |  |  |  |  |
| During this interview, I expect that I will be able to use hand gestures. |  |  |  |  |  |
| During this interview, I expect that I will be able to nod my head to show agreement with the opinion of the interviewer. |  |  |  |  |  |

##### Construal Level

Instructions: Any behavior can be expressed in many ways. For example, regarding the behavior of "typing", some people describe it as "tapping the keyboard", while others describe it as "expressing ideas". Everyone has their own preferences for description methods. Please, based on your first reaction, choose the option that you think best describes each behavior from the two descriptions (a and b) for each behavior below. There is no right or wrong answer.

| 1. Making a list   a. Getting organizedⁿ  b. Writing things down | 9. Painting a room  a. Applying brush strokes  b. Making the room look freshⁿ | 17. Taking a test  a. Answering questions  b. Showing one’s knowledgeⁿ |
| --- | --- | --- |
| 1. Reading   a. Following lines of print  b. Gaining knowledgeⁿ | 10. Paying the rent  a. Maintaining a place to liveⁿ  b. Writing a check | 18. Greeting someone  a. Saying hello  b. Showing friendlinessⁿ |
| 1. Joining the Army   a. Helping the Nation’s defenseⁿ  b. Signing up | 11. Caring for houseplants  a. Watering plants  b. Making the room look niceⁿ | 19. Resisting temptation  a. Saying “no”  b. Showing moral courageⁿ |
| 1. Washing clothes   a. Removing odors from clothesⁿ  b. Putting clothes into the machine | 12. Locking a door  a. Putting a key in the lock  b. Securing the houseⁿ | 20. Eating  a. Getting nutritionⁿ  b. Chewing and swallowing |
| 1. Picking an apple   a. Getting something to eatⁿ  b. Pulling an apple off a branch | 13. Voting  a. Influencing the electionⁿ  b. Marking a ballot | 21. Growing a garden  a. Planting seeds  b. Getting fresh vegetablesⁿ |
| 1. Chopping down a tree   a. Wielding an axe  b. Getting firewoodⁿ | 14. Climbing a tree  a. Getting a good viewⁿ  b. Holding on to branches | 22. Traveling by car  a. Following a map  b. Seeing countrysideⁿ |
| 1. Measuring a room for carpeting   a. Getting ready to remodelⁿ  b. Using a yardstick | 15. Filling out a personality test  a. Answering questions  b. Revealing what you’re likeⁿ | 23. Having a cavity filled  a. Protecting your teethⁿ  b. Going to the dentist |
| 1. Cleaning the house   a. Showing one’s cleanlinessⁿ  b. Vacuuming the floor | 16. Toothbrushing  a. Preventing tooth decayⁿ  b. Moving a brush around in one’s mouth | 24. Talking to a child  a. Teaching a child somethingⁿ  b. Using simple words |
|  |  | 1. Pushing a doorbell   a. Moving a finger  b. Seeing if someone’s homeⁿ |

*Note: ⁿ= Higher-level alternative.

##### Fairness Perceptions

Instructions: Please recall the just-concluded interview process. To what extent do the following descriptions match? (1 = “strongly disagree” to 5 = “strongly agree”)

|  | Strongly disagree | Disagree | Neither agree nor disagree | Agree | Strongly agree |
| --- | --- | --- | --- | --- | --- |
| Doing well on such an interview means I could do well on the job I have in mind. |  |  |  |  |  |
| A person who scored well on this interview will do well on the job I have in mind. |  |  |  |  |  |
| I could really show my skills and abilities in such an interview. |  |  |  |  |  |
| Such an interview would allow me to show what my job skills are. |  |  |  |  |  |
| Such an interview gives applicants the opportunity to show what they can really do. |  |  |  |  |  |
| I would be able to show what I can in such an interview. |  |  |  |  |  |
| There would be enough communication in such an interview. |  |  |  |  |  |
| I would be satisfied with the communication that occurred during such an interview. |  |  |  |  |  |
| I would feel comfortable asking questions about such an interview if I had any. |  |  |  |  |  |
| I would be comfortable with the idea of expressing my concerns in such an interview. |  |  |  |  |  |
| I think that such an interview is a fair way to select people for the job I have in mind. |  |  |  |  |  |
| I think that such interview itself would be fair. |  |  |  |  |  |
