# Supplementary material for: How Does the Job Interview Medium Affect Fairness Perceptions and Interview Ratings? The Mediating Role of Perceptions of Social Presence Does the Job Interview Medium Affect Fairness Perceptions and Interview Ratings? The Mediating Role of Perceptions of Social Presence
Source: Research Square preprint supplement (doi:10.21203/rs.3.rs-7538230/v1), 2025-10-06
Supplement: Supplementary file 2 [file e6932016555f27c1dcf5b296.docx]

#### Appendix 2 English Version of the Interview Instrument

Guidance: Hello, and thank you for agreeing to participate in this experimental study. Next, you will take part in an interview for the management trainee position at the headquarters of Huayue Group. We hope candidates can answer the interview questions based on real situations. Interview scores will be recorded to generate a result report for you. Thank you for your participation!

| Questions | Dimension | Behavioral Indicators/Reference Standards |
| --- | --- | --- |
| 1. Please describe the biggest challenge you have encountered when arranging matters in your work or daily life. How did you ensure that you completed the task? | Planning and organization | Clearly define task objectives and develop work plans in advance; fully consider various possible situations; effectively manage time and various resources (human, material, and financial resources); set reasonable checks to review work progress and make necessary modifications; adjust according to situational changes. |
| 2. Have you encountered urgent situations in your work or life? How did you feel at that time? What did you do? | Flexibility and adaptability | Do not panic when facing urgent situations; quickly judge sudden situations and predict their impacts; identify key issues in urgent situations and prioritize the overall picture; think quickly and adapt in sudden scenarios; draw on past experiences to handle unexpected situations. |
| 3.Imagine this situation: You believe you have performed well in all aspects of your department and achieved excellent results, yet you still have not gained the trust of the department leader. Instead, some colleagues who are less capable become very close to the leader because of their eloquence, which leaves you feeling quite distressed. What would you do? | Interpersonal skills | Excellent (9-10 points): Acknowledge the existence of such a situation, understand that strong work ability and outstanding achievements do not necessarily earn the appreciation of leaders or the recognition of colleagues. Honestly analyze the reasons, have a relatively objective understanding of interpersonal communication, and be willing to make efforts to change your own weaknesses.  Good (7-8 points): Realize the existence of such interpersonal environments, actively reflect on your own role in the situation, and state that it will not affect personal emotions and you can get along harmoniously with everyone.  Fair (4-6 points): Have negative thoughts inwardly, but also admit that you do have certain weaknesses and are willing to strive to change the situation.  Poor (1-3 points): Think you have been treated unfairly and keep a distance from leaders and classmates; or think leaders lack discernment and only you have been working hard, ultimately failing to improve relationships with others. |

#### Interview ratings

| Evaluation Elements | Overall Impression | Verbal Communication | Logical Thinking | Planning and Organization | Flexibility and Adaptability | Interpersonal Skills |
| --- | --- | --- | --- | --- | --- | --- |
| Inspection Points | Mental outlook, personal qualities, demeanor, grace, and politeness | Clear language, accurate expression, fluency, logical organization, and persuasiveness | Evaluation follows the STAR principle, emphasizing clarity of thought, strict logic, and accuracy. | Evaluate according to the behavioral indicators specified for each interview question. | Evaluate according to the behavioral indicators specified for each interview question. | Evaluate according to the behavioral indicators specified for each interview question. |
| Scores for Each Dimension |  |  |  |  |  |  |
